# Supplementary material for: Krill oil prevents lipopolysaccharide-evoked acute liver injury in mice through inhibition of oxidative stress and inflammation
Source: Royal Society of Chemistry journal article supplement (doi:10.1039/d1fo04136c), 2022-01-01
Supplement: d1fo04136c1.pdf [file d1fo04136c1.pdf]

## Supplementary Information

### **Krill oil prevents lipopolysaccharide-evoked acute liver injury in mice through inhibition of oxidative stress and inflammation**

Lei Du <sup>a,b</sup>, Yan Zheng <sup>a</sup>, Yu-Hong Yang <sup>c</sup>, Yu-Jie Huang <sup>b</sup>, Yi-Ming Hao <sup>b</sup>, Chen Chen<sup>b</sup>, Bao-Zhen Wang<sup>b</sup>, Xin Guo <sup>a,b</sup>, Hao Wu <sup>a,b,\*</sup>, Guo-Hai Su <sup>a\*</sup>

<sup>a</sup> Research Center of Translational Medicine, Jinan Central Hospital, Cheeloo College of Medicine, Shandong University, No.105 Jiefang Road, Jinan, Shandong, 250013, China.

<sup>b</sup> Department of Nutrition and Food Hygiene, School of Public Health, Cheeloo College of Medicine, Shandong University, No.44 Wenhuxi Road, Jinan, Shandong, 250012, China.

<sup>c</sup> School of Food Science & Engineering, Qilu University of Technology (Shandong Academy of Sciences), No.3501 Daxue Road, Jinan, Shandong, 250353, China.

\* Correspondence authors:

Prof. Hao Wu, Department of Nutrition and Food Hygiene, School of Public Health, Cheeloo College of Medicine, Shandong University, No.44 Wenhuxi Road, Jinan, Shandong, 250012, China. E-mail address: [hwu@sdu.edu.cn](mailto:hwu@sdu.edu.cn).

Prof. Guo-Hai Su, Research Center of Translational Medicine, Jinan Central Hospital, Cheeloo College of Medicine, Shandong University, No.105 Jiefang Road, Jinan, Shandong, 250013, China. E-mail address: [ggtstg@163.com](mailto:ggtstg@163.com).

**Table S1** Composition analysis of KO and FO. Values are expressed as mean  $\pm$  standard deviation (SD) (n=3).

**Table S2** Antibodies used in this study.

**Table S3** Sequences of primers used for qRT-PCR.

**Figure S1** KO pretreatment mitigated LPS-induced hepatic overexpression of pro-inflammatory mediators in mice. The relative mRNA levels of TNF- $\alpha$  (A), IL-1 $\beta$  (B), IL-6 (C), iNOS (D) and COX-2 (E) in liver. The mRNA levels for target genes were measured by qRT-PCR and the housekeeping gene *Gapdh* was used as an internal control. Values are expressed as mean  $\pm$  SD (n=7), # $P$  < 0.05, ## $P$  < 0.01 as compared to control group; \* $P$  < 0.05, \*\* $P$  < 0.01 as compared to LPS group; & $P$  < 0.05, && $P$  < 0.01 as compared to LPS+KO group.

**Table S1** Composition analysis of KO and FO

| Ingredients                                  | Krill oil      | Fish oil     |
|----------------------------------------------|----------------|--------------|
| Astaxanthin (mg/kg)                          | 232.15 ± 10.86 | -            |
| Total phospholipids (g/100g)                 | 55.06 ± 1.69   | -            |
| Fatty acid composition (%/total fatty acids) |                |              |
| C12:0                                        | 0.22 ± 0.01    | 0.14 ± 0.01  |
| C14:0                                        | 10.51 ± 0.37   | 8.08 ± 0.30  |
| C14:0                                        | 10.51 ± 0.37   | 8.08 ± 0.30  |
| C16:0                                        | 25.77 ± 0.86   | 18.18 ± 0.61 |
| C16:1                                        | 6.15 ± 0.28    | 9.65 ± 0.35  |
| C18:0                                        | 0.28 ± 0.01    | 4.03 ± 0.14  |
| C18:1                                        | 14.20 ± 0.45   | 10.81 ± 0.28 |
| C18:2                                        | 1.33 ± 0.03    | 4.26 ± 0.04  |
| C18:3 n-3                                    | 0.24 ± 0.01    | 0.29 ± 0.01  |
| C18:3 n-6                                    | 1.35 ± 0.04    | 0.89 ± 0.02  |
| C20:0                                        | -              | 0.29 ± 0.01  |
| C20:1                                        | 0.05 ± 0.00    | -            |
| C20:2                                        | 0.13 ± 0.01    | 0.45 ± 0.02  |
| C20:3                                        | 0.27 ± 0.01    | 0.21 ± 0.01  |
| C20:4 (AA)                                   | 0.73 ± 0.03    | 1.48 ± 0.08  |
| C20:5 (EPA)                                  | 22.89 ± 0.72   | 23.61 ± 0.75 |
| C22:6 (DHA)                                  | 13.83 ± 0.41   | 13.84 ± 0.36 |

Values are expressed as mean ± SD (n=3).

**Table S2** Antibodies used in this study

| Antibody                        | Source | Venodr                    | Catalog No. | Dilution |
|---------------------------------|--------|---------------------------|-------------|----------|
| ASC                             | Rabbit | Cell Signaling Technology | 67824       | 1:1000   |
| Caspase-1                       | Mouse  | AdipoGen                  | AG-20B-0042 | 1:1000   |
| COX2                            | Rabbit | Cell Signaling Technology | 12282       | 1:1000   |
| F4/80                           | Rabbit | Cell Signaling Technology | 70076       | 1:400    |
| GAPDH                           | Rabbit | Cell Signaling Technology | 2118        | 1:1000   |
| Phospho-I $\kappa$ B $\alpha$   | Rabbit | Cell Signaling Technology | 2859        | 1:1000   |
| I $\kappa$ B $\alpha$           | Rabbit | Cell Signaling Technology | 4812        | 1:1000   |
| IL-1 $\beta$                    | Mouse  | Cell Signaling Technology | 12242       | 1:1000   |
| iNOS                            | Rabbit | Cell Signaling Technology | 13120       | 1:1000   |
| MyD88                           | Rabbit | Cell Signaling Technology | 4283        | 1:1000   |
| Phospho-NF- $\kappa$ B p65      | Rabbit | Cell Signaling Technology | 3033        | 1:1000   |
| NF- $\kappa$ B p65              | Rabbit | Cell Signaling Technology | 8242        | 1:1000   |
| NLRP3                           | Rabbit | Cell Signaling Technology | 15101       | 1:1000   |
| TLR4                            | Rabbit | Cell Signaling Technology | 14358       | 1:1000   |
| Anti-rabbit HRP-linked antibody | Goat   | Cell Signaling Technology | 7074        | 1:10000  |
| Anti-mouse HRP-linked antibody  | Goat   | Proteintech               | PR30009     | 1:10000  |

**Table S3** Sequences of primers used for qRT-PCR

| Gene                           | Sequences (5'-3')                   |
|--------------------------------|-------------------------------------|
| <i>Cox-2</i>                   | Forward: ATGCTCCTGCTTGAGTATGT       |
|                                | Reverse: CACTACATCCTGACCCACTT       |
| <i>Il-1<math>\beta</math></i>  | Forward: AGTTGACGGACCCCAAAG         |
|                                | Reverse: AGCTGGATGCTCTCATCAGG       |
| <i>Il-6</i>                    | Forward: GCTACCAAACCTGGATATAATCAGGA |
|                                | Reverse: CCAGGTAGCTATGGTACT         |
| <i>inos</i>                    | Forward: ATCTTGGAGCGAGTTGTGGATTGTC  |
|                                | Reverse: TAGGTGAGGGCTTGGCTGAGTG     |
| <i>Tnf-<math>\alpha</math></i> | Forward: TCTTCTCATTCTGCTTGTGG       |
|                                | Reverse: GGTCTGGCCATAGAACTGA        |
| <i>Gapdh</i>                   | Forward: TGGTGAAGGTCGGTGTGAAC       |
|                                | Reverse: GCTCCTGGAAGATGGTGTATGG     |

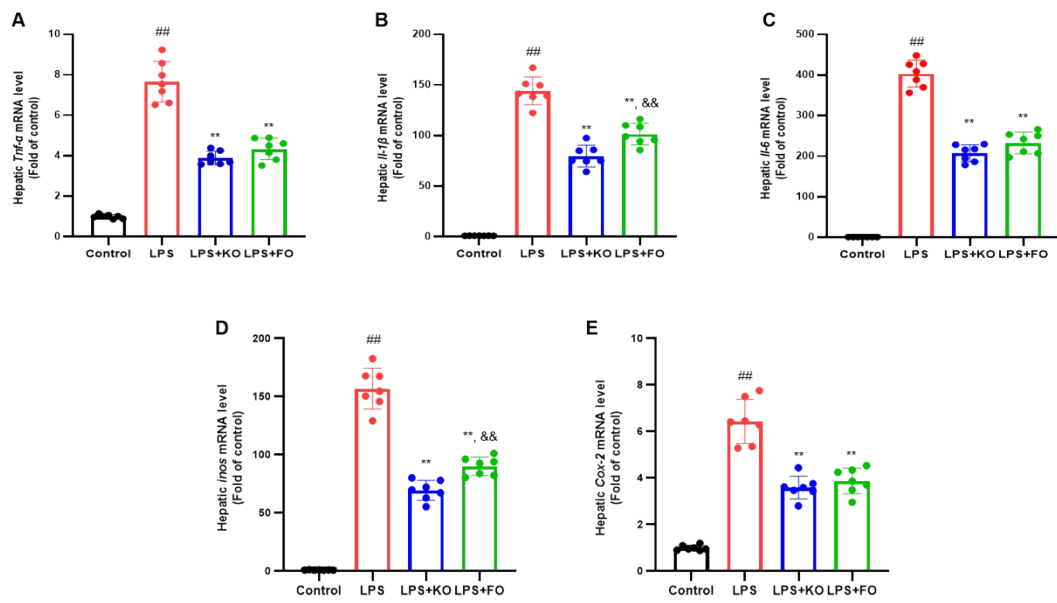

**Figure S1** KO pretreatment mitigated LPS-induced hepatic overexpression of pro-inflammatory mediators in mice.
